# Supplementary material for: Seno-destructive smooth muscle cells in the ascending aorta of patients with bicuspid aortic valve disease
Source: PubMed Central journal article supplement — eBioMedicine. 2019 May 9;43:54–66. doi: 10.1016/j.ebiom.2019.04.060 (PMC6562112; doi:10.1016/j.ebiom.2019.04.060), 2019-05-09
Supplement: mmc1.pdf [file mmc1.pdf]

**Seno-destructive smooth muscle cells in the ascending aorta of patients with bicuspid aortic valve disease**

**Supplementary Materials and Methods**

**Table S1 Primer sequences for reverse transcription-quantitative PCR**

| <b>Gene</b>                    | <b>Forward sequence</b>  | <b>Reverse sequence</b>  |
|--------------------------------|--------------------------|--------------------------|
| CDKN2A (P16 <sup>Ink4a</sup> ) | CTCGTGCTGATGCTACTGAGGA   | GGTCGGCGCAGTTGGGCTCC     |
| CDKN1A (P21)                   | AGGTGGACCTGGAGACTCTCAG   | TCCTCTTGGAGAAGATCAGCCG   |
| MMP1                           | ATGAAGCAGCCCAGATGTGGAG   | TGGTCCACATCTGCTCTTGGCA   |
| MMP2                           | AGCGAGTGGATGCCGCCTTAA    | CATTCCAGGCATCTGCGATGAG   |
| MMP3                           | CACTCACAGACCTGACTCGGTT   | AAGCAGGATCACAGTTGGCTGG   |
| MMP7                           | TCGGAGGAGATGCTCACTTCGA   | GGATCAGAGGAATGTCCCATAACC |
| MMP8                           | CAACCTACTGGACCAAGCACAC   | TGTAGCTGAGGATGCCTTCTCC   |
| MMP9                           | GCCACTACTGTGCCTTTGAGTC   | CCCTCAGAGAATCGCCAGTACT   |
| MMP10                          | TCCAGGCTGTATGAAGGAGAGG   | GGTAGGCATGAGCCAAACTGTG   |
| MMP11                          | GAGAAGACGGACCTCACCTACA   | CTCAGTAAAGGTGAGTGGCGTC   |
| MMP12                          | GATGCTGTCACTACCGTGGGAA   | CAATGCCAGATGGCAAGGTTGG   |
| MMP13                          | CCTTGATGCCATTACCAGTCTCC  | AAACAGCTCCGCATCAACCTGC   |
| MMP14                          | CCTTGGACTGTCAGGAATGAGG   | TTCTCCGTGTCATCCACTGGT    |
| MMP15                          | CTGGCTCTTTCGAGAAGCGAAC   | TCTCCTCGTTGAAGCGCCAGTA   |
| MMP16                          | GATTCAGCCATTTGGTGGGAGG   | CCCTTCCAGACTGTGATTGGC    |
| TIMP1                          | GGAGAGTGTCTGCGGATACTTC   | GCAGGTAGTGATGTGCAAGAGTC  |
| TIMP2                          | ACCCTCTGTGACTTCATCGTGC   | GGAGATGTAGCACGGGATCATG   |
| TIMP3                          | TACCGAGGCTTCACCAAGATGC   | CATCTTGCCATCATAGACGCGAC  |
| TIMP4                          | CACTACCATCTGAACTGTGGCTG  | GCTTTCGTTCCAACAGCCAGTC   |
| COL1A1                         | GATTCCCTGGACCTAAAGGTGC   | AGCCTCTCCATCTTTGCCAGCA   |
| COL1A2                         | CCTGGTGCTAAAGGAGAAAAGAGG | ATCACCACGACTTCCAGCAGGA   |
| COL3A1                         | TGGTCTGCAAGGAATGCCTGGA   | TCTTCCCTGGGACACCATCAG    |
| COL7A1                         | GTTGGAGAGAAAGGTGACGAGG   | TGGTCTCCCTTTTCACCACAG    |
| COL8A1                         | AGGAAGCCGTACCCAAGAAAGG   | GGTATCCCATGACCTGGCAAAC   |
| COL12A1                        | CAGTGCTGTAGTCAGCCTGAA    | GGTCTTGTGGCTCTGTGTCCT    |
| COL14A1                        | CACAAACCTCCTCAGCGGAATG   | GGCTTGGAGATTGGTAACACCC   |
| COL15A1                        | GGTGACACTGGTTTACCTGGCT   | GCCTTCCAGAGGAATGTCTC     |
| COL16A1                        | AACAGTGAGGGAGATCCTGGCT   | CAACAGCACCAGGAAAACCTGG   |
| CCL2 (MCP-1)                   | AGAATCACCAGCAGCAAGTGTCC  | TCCTGAACCCACTTCTGCTTGG   |
| CCL3 (MIP-1 $\alpha$ )         | ACTTTGAGACGAGCAGCCAGTG   | TTCTGGACCCACTCCTCACTG    |
| IL1B                           | CCACAGACCTTCCAGGAGAATG   | GTGCAGTTCAGTGATCGTACAGG  |
| IL6                            | AGACAGCCACTCACCTCTTCAG   | TTCTGCCAGTGCCTCTTTGCTG   |
| TGFB1                          | TACCTGAACCCGTGTTGCTCTC   | GTTGCTGAGGTATCGCCAGGAA   |
| TNF (TNF- $\alpha$ )           | CTCTTCTGCCTGCTGCACCTTG   | ATGGGCTACAGGCTTGTCACTC   |
| RNA18S5 (18S)                  | ACCCGTTGAACCCCATTCGTGA   | GCCTCACTAAACCATCCAATCGG  |

## Supplementary Tables

**Table S2 Clinical information for subjects with TAV and non-aneurysmal ascending aorta**

| Patient | Surgery | Age | Sex | Ascending Aorta Diameter (cm) | Normalized Ascending Aorta Diameter (cm/m <sup>2</sup> ) |
|---------|---------|-----|-----|-------------------------------|----------------------------------------------------------|
| 1       | CABG    | 83  | M   | 3.5                           | 1.9                                                      |
| 2       | CABG    | 53  | M   | 3.8                           | 1.8                                                      |
| 3       | CABG    | 85  | F   | 2.8                           | 1.5                                                      |
| 4       | HT R    | 70  | F   | 2.5                           | 1.8                                                      |
| 5       | HT R    | 41  | F   | 3.5                           | 1.8                                                      |
| 6       | HT D    | ND  | ND  | ND                            | ND                                                       |
| 7       | HT R    | ND  | ND  | ND                            | ND                                                       |
| 8       | CABG    | 78  | M   | 3.2                           | 1.7                                                      |
| 9       | CABG    | 84  | F   | 2.8                           | 1.9                                                      |
| 10      | CABG    | 86  | F   | 3.3                           | 2.4                                                      |
| 11      | HT R    | 59  | M   | 3.7                           | 2.3                                                      |
| 12      | HT D    | ND  | ND  | ND                            | ND                                                       |
| 13      | HT R    | 18  | M   | 3.3                           | 1.7                                                      |
| 14      | HT D    | ND  | ND  | ND                            | ND                                                       |
| 15      | HT D    | ND  | ND  | ND                            | ND                                                       |

CABG, coronary artery bypass graft; HT R, heart transplant recipient; HT D heart transplant donor. ND, Not determined;

**Table S3 Clinical information for patients with BAV and non-aneurysmal ascending aorta**

| <b>Patient</b> | <b>Age</b> | <b>Sex</b> | <b>Aortic Valve Configuration Sievers Classification</b> | <b>Aortic Valve Dysfunction</b> | <b>Ascending Aorta Diameter (cm)</b> | <b>Normalized Ascending Aorta Diameter (cm/m<sup>2</sup>)</b> |
|----------------|------------|------------|----------------------------------------------------------|---------------------------------|--------------------------------------|---------------------------------------------------------------|
| 1              | 59         | M          | Type 1; R-L                                              | AS                              | 4.2                                  | 2.0                                                           |
| 2              | 56         | M          | Type 1; R-L                                              | AR                              | 4.2                                  | 1.8                                                           |
| 3              | 32         | M          | Type 1; R-L                                              | AR                              | 3.1                                  | 1.5                                                           |
| 4              | 50         | F          | Type 1; R-L                                              | AS                              | 4.1                                  | 1.9                                                           |
| 5              | 53         | M          | Type 1; R-L                                              | AS                              | 3.3                                  | 1.7                                                           |
| 6              | 50         | M          | Type 0; R-L                                              | AR                              | 3.5                                  | 1.8                                                           |
| 7              | 55         | M          | Type 1; R-L                                              | AR                              | 3.5                                  | 1.9                                                           |
| 8              | 30         | M          | Type 1; R-L                                              | AR                              | 3.4                                  | 1.9                                                           |
| 9              | 59         | M          | Type 0; Lateral                                          | AS                              | 4.3                                  | 2.0                                                           |
| 10             | 22         | F          | Type 0; Lateral                                          | AS                              | 3.4                                  | 2.6                                                           |

AR, aortic regurgitation ( $\geq$  moderate); AS, aortic stenosis ( $\geq$  moderate)

**Table S4** Clinical information for patients with TAV-associated ascending aortic aneurysm

| <b>Patient</b> | <b>Age</b> | <b>Sex</b> | <b>Aortic Valve Dysfunction</b> | <b>Ascending Aorta Diameter (cm)</b> | <b>Normalized Ascending Aorta Diameter (cm/m<sup>2</sup>)</b> |
|----------------|------------|------------|---------------------------------|--------------------------------------|---------------------------------------------------------------|
| 1              | 72         | M          | Mild AS                         | 5.0                                  | 2.4                                                           |
| 2              | 80         | F          | None                            | 5.1                                  | 2.9                                                           |
| 3              | 75         | F          | None                            | 6.3                                  | 3.7                                                           |
| 4              | 80         | M          | None                            | 4.9                                  | 2.6                                                           |
| 5              | 62         | M          | AR                              | 5.6                                  | 2.8                                                           |
| 6              | 81         | F          | AR                              | 4.3                                  | 2.3                                                           |
| 7              | 79         | F          | AR                              | 6.5                                  | 3.3                                                           |
| 8              | 69         | F          | None                            | 4.9                                  | 2.7                                                           |
| 9              | 74         | M          | Mild AR                         | 6.8                                  | 3.4                                                           |
| 10             | 33         | M          | Mild AR                         | 5.3                                  | 2.5                                                           |
| 11             | 55         | F          | None                            | 4.5                                  | 2.5                                                           |
| 12             | 69         | M          | None                            | 5.3                                  | 2.7                                                           |
| 13             | 70         | M          | Mild AR                         | 5.8                                  | 2.5                                                           |
| 14             | 64         | M          | AR                              | 4.5                                  | 2.1                                                           |

AR, aortic regurgitation ( $\geq$  moderate unless specified); AS, aortic stenosis ( $\geq$  moderate unless specified)

**Table S5** Clinical information for patients with BAV-associated ascending aortic aneurysm

| Patient | Age | Sex | Aortic Valve Configuration Sievers Classification | Aortic Valve Dysfunction | Ascending Aorta Diameter (cm) | Normalized Ascending Aorta Diameter (cm/m <sup>2</sup> ) |
|---------|-----|-----|---------------------------------------------------|--------------------------|-------------------------------|----------------------------------------------------------|
| 1       | 75  | F   | Type 1; R-L                                       | AS                       | 4.4                           | 2.9                                                      |
| 2       | 62  | M   | Type 1; R-N                                       | AS                       | 5.1                           | 2.6                                                      |
| 3       | 56  | M   | Type 1; R-L                                       | AS                       | 4.6                           | 2.1                                                      |
| 4       | 64  | M   | Type 1; R-N                                       | AR/AS                    | 5.4                           | 2.7                                                      |
| 5       | 55  | M   | Type 0; Lateral                                   | AS                       | 5.5                           | 2.6                                                      |
| 6       | 37  | M   | Type 1; R-N                                       | None                     | 5.1                           | 2.0                                                      |
| 7       | 31  | M   | Type 2; R-L, R-N                                  | AR/AS                    | 5.8                           | 2.9                                                      |
| 8       | 63  | F   | Type 1; R-L                                       | AR                       | 5.2                           | 2.6                                                      |
| 9       | 44  | M   | Type 1; R-L                                       | AR                       | 5.4                           | 2.8                                                      |
| 10      | 70  | M   | Type 1; R-L                                       | AR                       | 5.4                           | 2.7                                                      |
| 11      | 56  | M   | Type 1; R-L                                       | AR                       | 5.1                           | 2.6                                                      |
| 12      | 73  | M   | Type 1; R-L                                       | AR                       | 5.5                           | 2.6                                                      |
| 13      | 40  | M   | Type 1; R-L                                       | AR                       | 5.7                           | 2.7                                                      |
| 14      | 64  | M   | Type 1; R-L                                       | AS                       | 4.1                           | 2.2                                                      |
| 15      | 63  | M   | Type 1; R-L                                       | AS                       | 4.3                           | 2.5                                                      |
| 16      | 79  | M   | Type 1; R-L                                       | AR                       | 4.6                           | 2.4                                                      |
| 17      | 52  | M   | Type 1; R-L                                       | AR/AS                    | 6.1                           | 2.7                                                      |
| 18      | 55  | M   | Type 1; R-L                                       | AR                       | 5.3                           | 2.4                                                      |
| 19      | 74  | M   | Type 1; R-N                                       | AR                       | 4.4                           | 2.2                                                      |
| 20      | 56  | M   | Type 0; Lateral                                   | AS                       | 5.1                           | 2.7                                                      |
| 21      | 74  | F   | Type 1; R-N                                       | AS                       | 4.6                           | 2.7                                                      |
| 22      | 52  | M   | Type 1; R-L                                       | AR                       | 5.2                           | 2.4                                                      |
| 23      | 68  | M   | Type 1; R-L                                       | AR/AS                    | 5.9                           | 3.0                                                      |
| 24      | 62  | F   | Type 1; R-L                                       | AS                       | 5.4                           | 2.7                                                      |
| 25      | 43  | F   | Type 1; R-L                                       | AS                       | 5.3                           | 2.9                                                      |
| 26      | 75  | M   | Type 1; R-L                                       | AS                       | 5.4                           | 2.6                                                      |
| 27      | 77  | M   | Type 1; R-L                                       | AR                       | 4.8                           | 2.5                                                      |
| 28      | 21  | M   | Type 0; R-L                                       | AR                       | 4.4                           | 2.2                                                      |
| 29      | 59  | M   | Type 1; R-L                                       | AR/AS                    | 5.3                           | 2.7                                                      |

AR, aortic regurgitation ( $\geq$  moderate); AS, aortic stenosis ( $\geq$  moderate)
